# Supplementary material for: Single-cell RNA sequencing identifies heterogeneous cell subtypes within gingival tissue
Source: Research Square preprint supplement (doi:10.21203/rs.3.rs-101475/v1), 2020-11-06
Supplement: Supplementary file 1 [file 89dfb8f2168590ac016dce9b.xlsx]

## Sheet: Sheet1
Cytogenetic location	Gene/Locus	Gene/Locus name	Gene/Locus MIM number	Phenotype	Phenotype MIM number	Inheritance	Pheno map key	Mouse Gene (from MGI)
6p24.3	DSP, KPPS2, PPKS2, DCWHKTA	Desmoplakin	125647	Dilated cardiomyopathy with woolly hair, keratoderma, and tooth agenesis	615821	Autosomal dominant	3	Dsp
12p13.31	C1S, EDSPD2	Complement component-1, s subcomponent	120580	Ehlers-Danlos syndrome, periodontal type, 2	617174	Autosomal dominant	3	C1s2,C1s1
12p13.31	C1R, EDSPD1	Complement component-1, r subcomponent	613785	Ehlers-Danlos syndrome, periodontal type, 1	130080	Autosomal dominant	3	C1rb,C1ra
4q21.21	ANTXR2, CMG2, HFS	Anthrax toxin receptor 2	608041	Hyaline fibromatosis syndrome	228600	Autosomal recessive	3	Antxr2
17q24.2	FAM20A, AIGFS, AI1G	Family with sequence similarity 20, member A	611062	Amelogenesis imperfecta, type IG (enamel-renal syndrome)	204690	Autosomal recessive	3	Fam20a
2p22.1	SOS1, GINGF, GF1, HGF, NS4	SOS Ras/Rac guanine nucleotide exchange factor 1	182530	?Fibromatosis, gingival, 1	135300	Autosomal dominant	3	Sos1
4q12	REST, NRSF, WT6, GINGF5, HGF5, DFNA27	RE1-silencing transcription factor	600571	Fibromatosis, gingival, 5	617626	Autosomal dominant	3	Rest
11q14.2	CTSC, CPPI, PALS, PLS, HMS, PDON1, JPD	Cathepsin C	602365	Periodontitis 1, juvenile	170650	Autosomal recessive	3	Ctsc
17q25.1	ITGB4	Integrin, beta-4	147557	Epidermolysis bullosa, junctional, non-Herlitz type	226650	Autosomal recessive	3	Itgb4
