# Supplementary material for: Single-cell RNA sequencing identifies heterogeneous cell subtypes within gingival tissue
Source: Research Square preprint supplement (doi:10.21203/rs.3.rs-101475/v1), 2020-11-06
Supplement: Supplementary file 2 [file a271577df41e71930896cbae.xlsx]

## Sheet: Sheet1
gene	conMean	otherMean	logFC	pValue	fdr
JE1
RUNX2...	0.0684592	0.00680929	-3.32967	0	0
ZNF774...	0.106059	0.0119997	-3.14379	0	0
MEF2A...	0.0296657	0.00400974	-2.88721	9.96513e-228	1.0885e-226
MSC...	0.133465	0.0191605	-2.80026	0	0
HOXC13...	0.0394974	0.00659789	-2.58168	6.96198e-172	4.70762e-171
ZNF311...	0.0288719	0.00628374	-2.19997	3.28016e-243	4.65782e-242
GLIS3...	0.0353427	0.00786258	-2.16834	3.14091e-105	1.04944e-104
TFEC...	0.0956578	0.0221332	-2.11167	0	0
TEAD3...	0.0368541	0.00879015	-2.06787	3.61747e-292	7.33829e-291
MEF2D...	0.0346824	0.00827668	-2.06708	1.49613e-287	2.65563e-286
JE2
AHR...	0.0177856	0.00152596	-3.54292	0	0
BHLHE22...	0.0143676	0.00143042	-3.32831	0	0
RUNX2...	0.053434	0.00587	-3.18633	0	0
TCF4...	0.0508968	0.00645153	-2.97986	0	0
MYEF2...	0.0679502	0.00980019	-2.7936	0	0
MSC...	0.113549	0.0168798	-2.74995	0	0
ZNF319...	0.0281537	0.00460481	-2.61211	0	0
ZNF774...	0.0700028	0.0114582	-2.61104	0	0
FOXJ1...	0.00910943	0.00152563	-2.57796	3.70195e-260	1.12585e-259
CREBZF...	0.0651406	0.0132945	-2.29273	6.04185e-308	2.28506e-307
BAS1
TCF7L1…	0.112145	0.0173504	-2.69233	0	0
TP63...	0.199653	0.036259	-2.46108	0	0
GLIS1...	0.0486737	0.0094407	-2.36618	0	0
THRB...	0.0346959	0.00728766	-2.25124	0	0
ZNF549...	0.0311465	0.00654445	-2.25073	0	0
KLF15...	0.0275927	0.00615733	-2.16391	0	0
TP73...	0.150438	0.036957	-2.02525	0	0
NR2F2...	0.0142027	0.00364595	-1.96179	0	0
NKX2.8...	0.0668024	0.0179851	-1.8931	0	0
TCFL5...	0.00678684	0.00190266	-1.83472	3.85635e-239	9.19835e-239
BAS2
E2F7...	0.0316581	0.00836023	-1.92096	0	0
SP9...	0.0963228	0.0274488	-1.81113	0	0
E2F2...	0.0291341	0.00844013	-1.78737	0	0
E2F8...	0.037544	0.0117845	-1.67169	0	0
NFYB...	0.0264759	0.00953969	-1.47266	0	0
FOXC1...	0.0101788	0.00367549	-1.46956	0	0
POLE3...	0.0455478	0.0164901	-1.46578	0	0
MYBL2...	0.0882036	0.0321339	-1.45674	0	0
E2F1...	0.0215694	0.00864993	-1.31823	0	0
BRCA1...	0.0412001	0.0179175	-1.20128	0	0
SPN1
VEZF1...	0.0189653	0.00884757	-1.10001	7.62044e-173	6.04192e-172
MEIS2...	0.0615469	0.0287407	-1.09859	7.94011e-289	1.95856e-287
U2AF1...	0.0263044	0.0130837	-1.00754	3.45818e-169	2.6473e-168
TCF12...	0.00905757	0.00553575	-0.710344	1.6979e-78	4.95964e-78
HLF...	0.032727	0.0207229	-0.659253	3.23223e-277	6.52322e-276
RBPJ...	0.00680024	0.00434168	-0.647332	1.59682e-138	8.86236e-138
SETDB1...	0.0039846	0.00260591	-0.612646	5.32778e-68	1.39149e-67
BCL6...	0.00650946	0.00454918	-0.516932	3.53315e-53	7.26258e-53
GABPA...	0.00479244	0.00342754	-0.48359	1.15517e-118	5.34266e-118
KLF8…	0.00598513	0.00431134	-0.473246	9.6695e-83	2.90085e-82
SPN2
POU2F2...	0.0205399	0.00798263	-1.36349	0	0
SNAI1...	0.056554	0.0221442	-1.3527	1.0606e-189	3.71212e-189
VEZF1...	0.018566	0.00908225	-1.03154	4.62241e-148	1.26271e-147
U2AF1...	0.0269568	0.0132518	-1.02446	1.08193e-152	3.02939e-152
EGR2...	0.0429658	0.0217525	-0.982009	0	0
REL...	0.0411529	0.0208567	-0.980481	0	0
SETBP1...	0.0260105	0.0136572	-0.92943	0	0
TRPS1...	0.0729206	0.0384916	-0.921783	2.01355e-196	7.39403e-196
MSX1...	0.0285992	0.0157245	-0.862965	0	0
FOXN3...	0.0709126	0.0397582	-0.834788	0	0
SPN3
EN1...	0.0358391	0.0275009	-0.382056	3.86468e-48	5.51778e-48
ALX3...	0.0251311	0.0195804	-0.360066	1.93915e-32	2.43132e-32
ETV2...	0.0406472	0.0336788	-0.271313	4.02012e-181	3.009e-180
PSMD12...	0.0539254	0.0447459	-0.26921	0	0
POLE4...	0.0605933	0.0505081	-0.262643	5.4883e-188	5.02078e-187
POLR3G...	0.0621848	0.052015	-0.257634	7.62492e-146	3.42428e-145
RARG...	0.226386	0.189931	-0.253305	4.71869e-127	1.53357e-126
MAF...	0.173767	0.150549	-0.206915	7.90476e-53	1.16915e-52
ESRRA...	0.0627953	0.0545402	-0.203339	0	0
NFE2L2...	0.321274	0.282369	-0.186222	9.60037e-79	1.81015e-78
GRN1
DLX3...	0.16602	0.0435431	-1.93084	0	0
ZFHX2...	0.0228067	0.00759139	-1.58702	0	0
GRHL3...	0.241802	0.102567	-1.23726	0	0
SP5...	0.0932057	0.0401009	-1.21678	2.69875e-275	1.1586e-274
RORC...	0.0406804	0.0183226	-1.15071	0	0
OLIG3...	0.0608989	0.0286328	-1.08875	5.1796e-204	1.43302e-203
ZNF16...	0.0140407	0.00663332	-1.08181	4.50175e-237	1.53553e-236
DLX5...	0.100841	0.0507184	-0.991508	0	0
GATA3...	0.0640574	0.0324003	-0.983358	0	0
NFE2L3...	0.00945372	0.00481173	-0.974326	5.56499e-218	1.64962e-217
GRN2
SP5...	0.168707	0.0269856	-2.64426	0	0
ZNF681...	0.0406392	0.00941705	-2.10952	0	0
NFE2L3...	0.0154638	0.00375599	-2.04163	1.34828e-244	2.51616e-244
GRHL3...	0.325054	0.0858228	-1.92125	0	0
BACH1...	0.0296803	0.0101246	-1.55164	0	0
NKX6.2...	0.0244902	0.0087434	-1.48594	0	0
PPARG...	0.0681088	0.0247703	-1.45923	0	0
PAX6...	0.0579095	0.0217836	-1.41056	0	0
ZNF16...	0.015149	0.00625328	-1.27654	1.50694e-267	3.04838e-267
RORC...	0.041334	0.0175895	-1.23261	0	0
GRN3
PPARD...	0.023757	0.000900822	-4.72097	0	0
NKX6.2...	0.110624	0.0077818	-3.82942	0	0
FOXC1...	0.0372146	0.00346854	-3.42347	7.92258e-221	3.56516e-220
TEAD1...	0.0337467	0.00341122	-3.30639	4.47101e-236	2.11785e-235
ZNF117...	0.350125	0.0446628	-2.97072	0	0
KDM4B...	0.0158213	0.00206638	-2.93669	5.99884e-245	2.94489e-244
SP5...	0.284211	0.0385671	-2.88152	0	0
BACH1...	0.0785948	0.0107112	-2.87531	0	0
GLIS3...	0.0455784	0.00766334	-2.5723	3.63376e-211	1.48654e-210
FOXD1...	0.118499	0.0203919	-2.53881	0	0
